# Supplementary material
Source: MDPI journal article supplement (https://www.mdpi.com/2073-4395/10/11/1703)
Supplement: s1 [file s1]

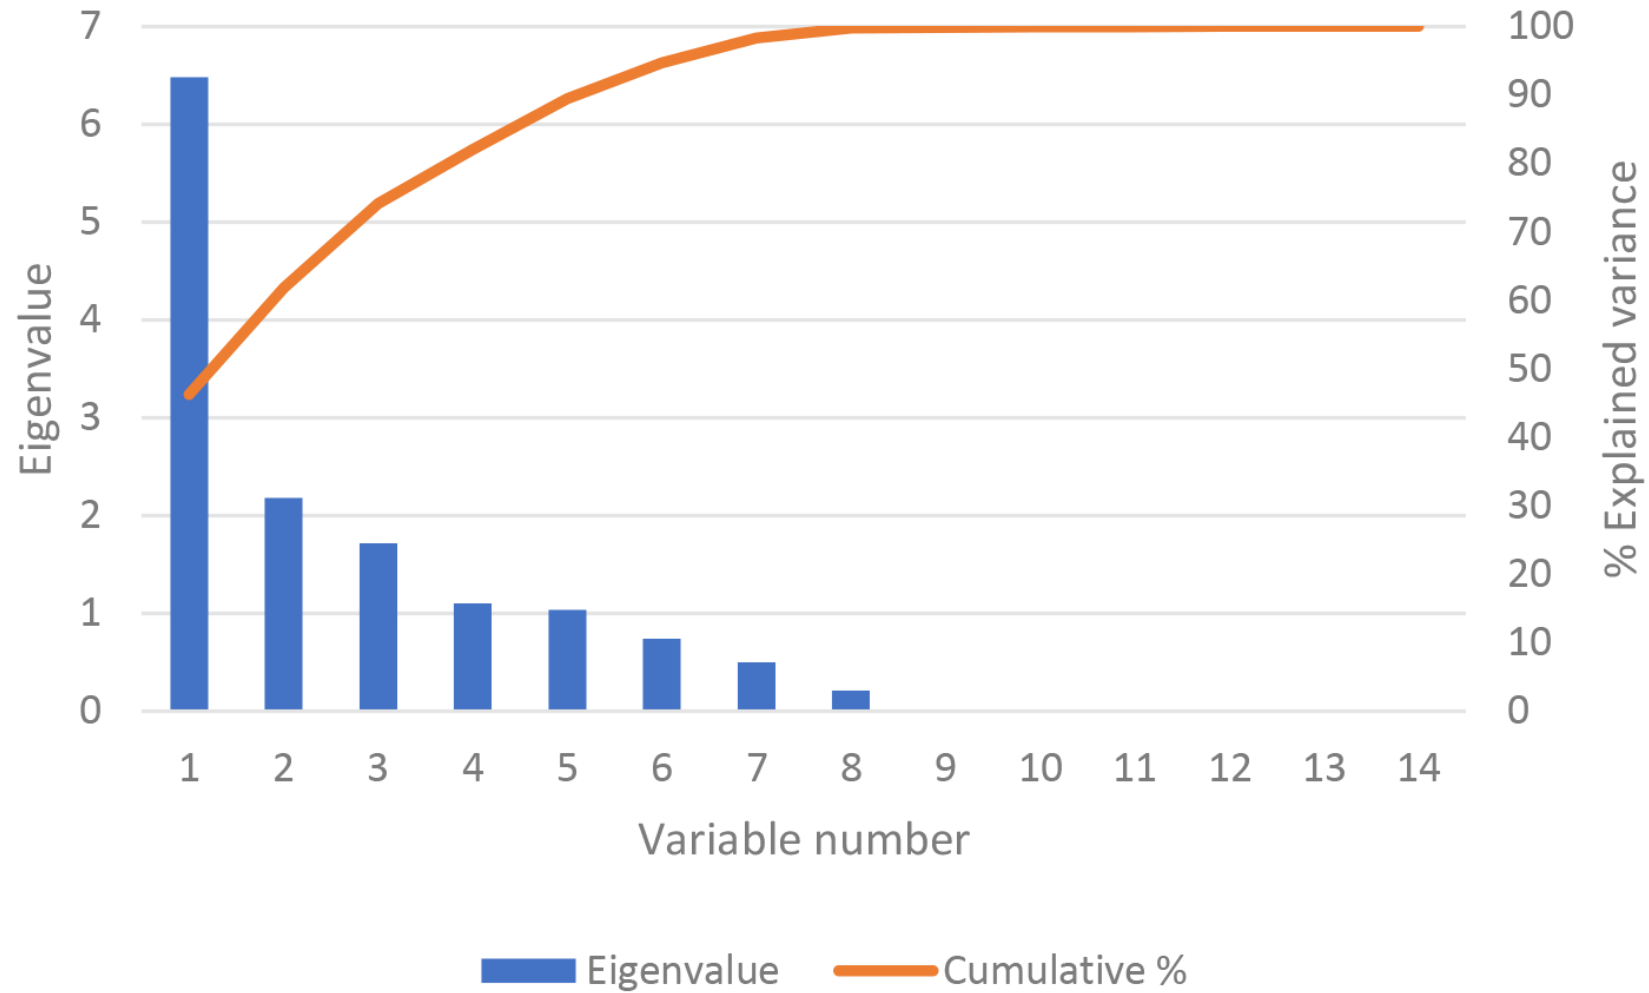

Supplementary Figure 1. Cumulative eigenvalues (blue bars) and percentage of total variance (orange line) of the variables from the Principal Component Analysis of morphological phenotyping

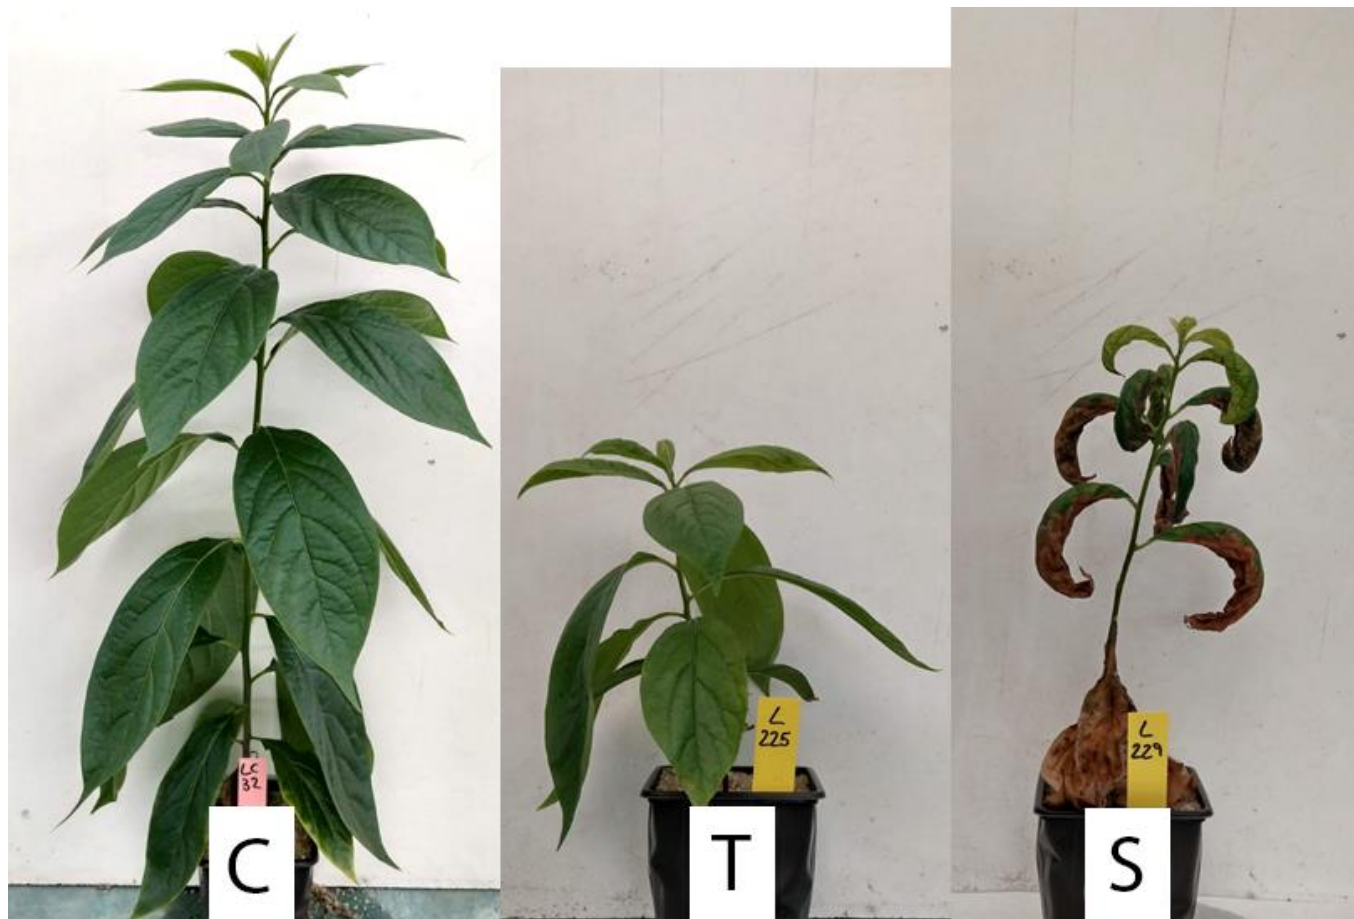

Supplementary Figure 2. Example of phenotypes after 60 days of treatment of control (C), tolerant (T) and sensitive (S) plants of *D. lotus*

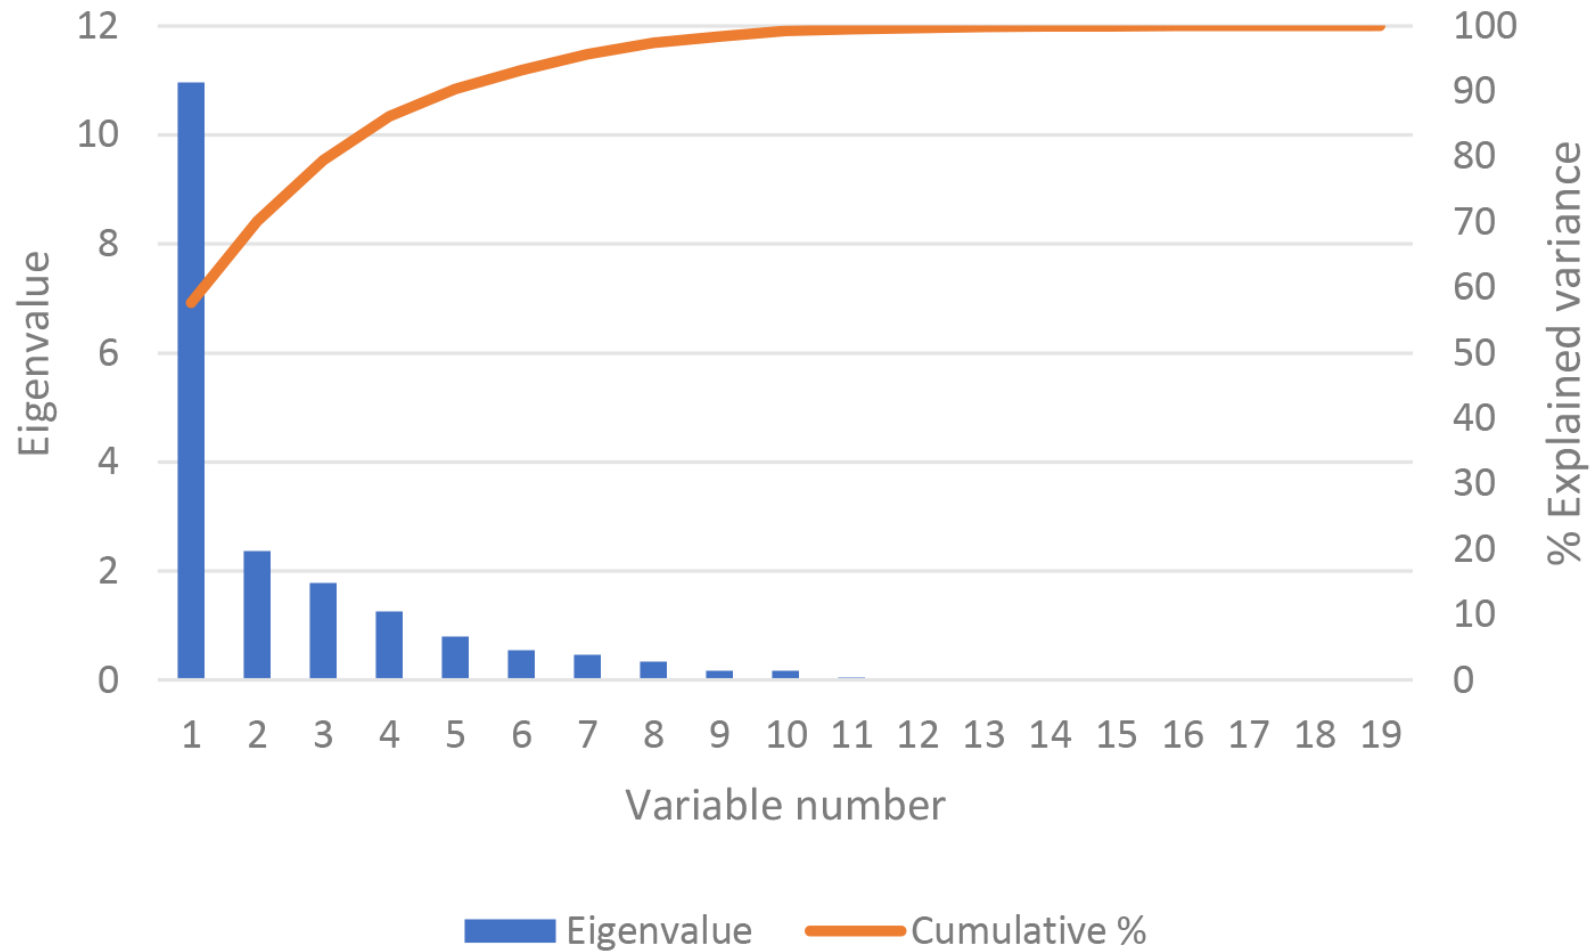

Supplementary Figure 3. Cumulative eigenvalues (blue bars) and percentage of total variance (orange line) of the variables from the Principal Component Analysis of physiological and morphological variables.

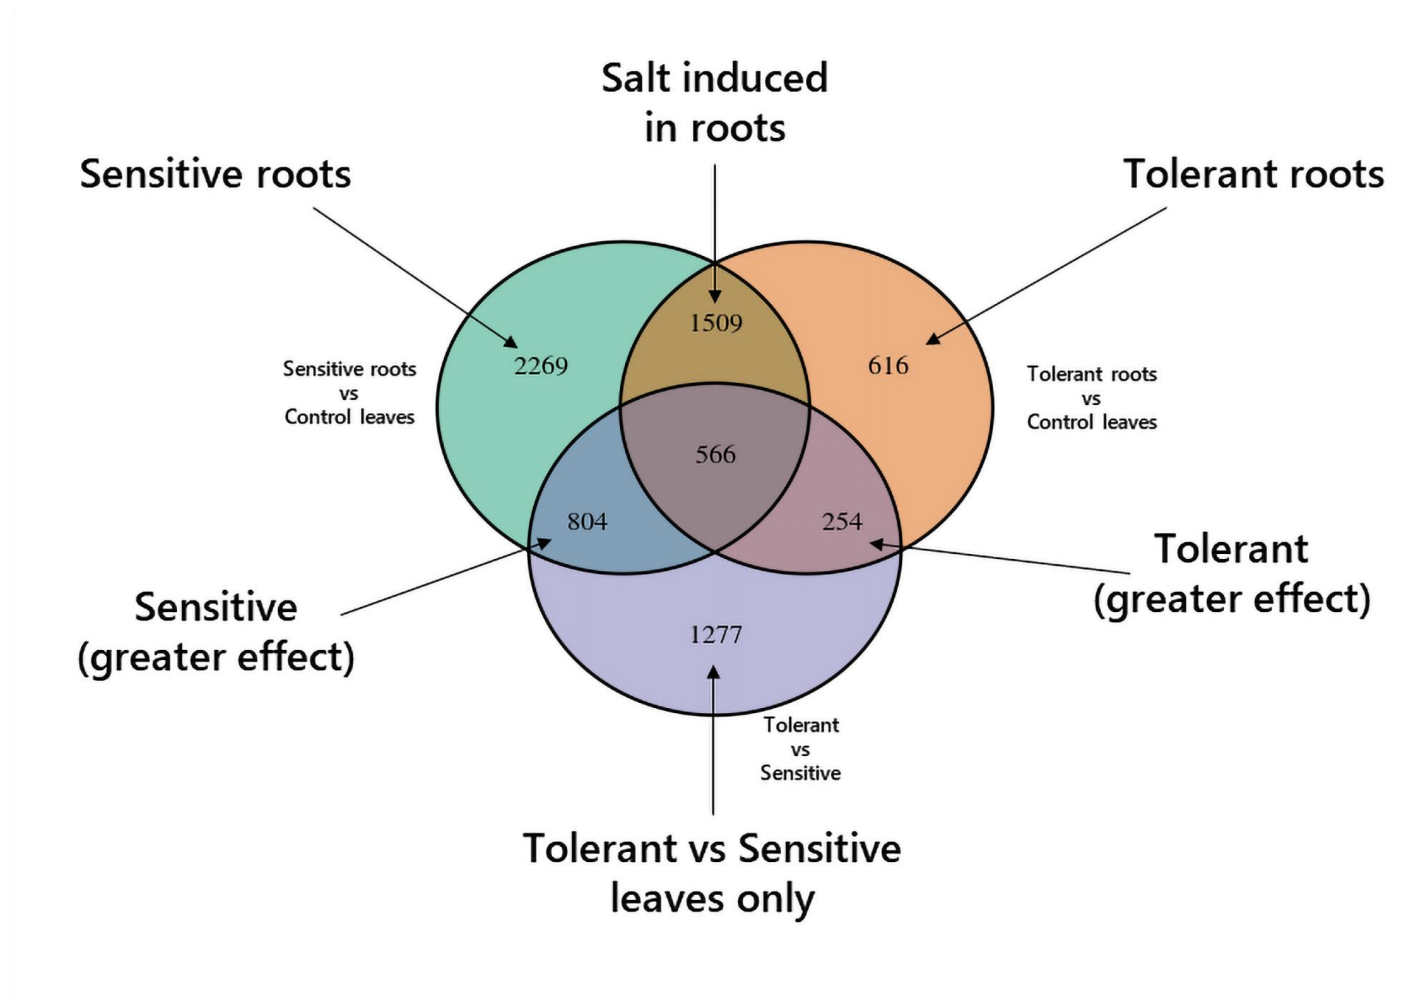

Supplementary Figure 4. Venn diagram of the orthogonal analysis for identification of leaf-specific differential expressed genes between tolerant and sensitive plants

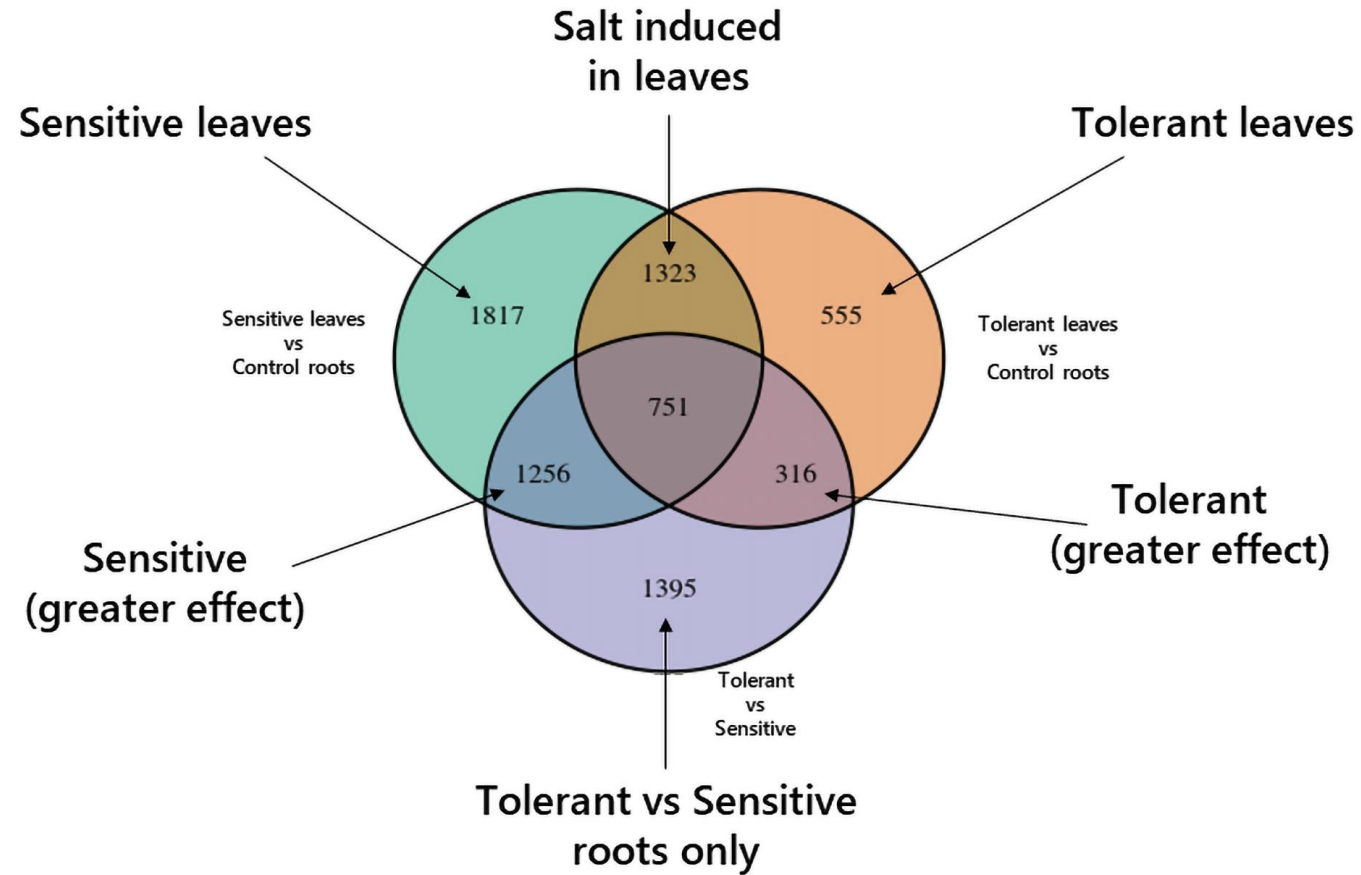

Supplementary Figure 5. Venn diagram of the orthogonal analysis for identification of root specific differential expressed genes between tolerant and sensitive plants
